# Supplementary material
Source: PubMed Central journal article supplement (PMC7261017)
Supplement: pnas.2000223117.sapp.pdf [file pnas.2000223117.sapp.pdf]

# PNAS

www.pnas.org

## **Supplementary Information for**

### **Identifying Sequence Perturbations to an Intrinsically Disordered Protein that Determine Its Phase Separation Behavior**

Benjamin S. Schuster<sup>1,a,b</sup>, Gregory L. Dignon<sup>1,c,d</sup>, Wai Shing Tang<sup>e</sup>, Fleurie M. Kelley<sup>b</sup>, Aishwarya Kanchi Ranganath<sup>b</sup>, Craig N. Jahnke<sup>f</sup>, Alison G. Simpkins<sup>f</sup>, Roshan Mammen Regy<sup>c</sup>, Daniel A. Hammer<sup>a,f</sup>, Matthew C. Good<sup>a,g</sup>, Jeetain Mittal<sup>c,2</sup>

<sup>a</sup> Department of Bioengineering, University of Pennsylvania, Philadelphia, PA, 19104

<sup>b</sup> Department of Chemical and Biochemical Engineering, Rutgers University, Piscataway, NJ 08854

<sup>c</sup> Department of Chemical and Biomolecular Engineering, Lehigh University, Bethlehem, PA 18015

<sup>d</sup> Laufer Center for Physical and Quantitative Biology, Stony Brook University, Stony Brook, NY, 11794

<sup>e</sup> Department of Physics, Brown University, Providence, RI, 02912

<sup>f</sup> Department of Chemical and Biomolecular Engineering, University of Pennsylvania, Philadelphia, PA, 19104

<sup>g</sup> Department of Cell and Developmental Biology, University of Pennsylvania, Philadelphia, PA, 19104

<sup>1</sup> These authors contributed equally to this work

<sup>2</sup> Corresponding author, [jeetain@lehigh.edu](mailto:jeetain@lehigh.edu)

#### **This PDF file includes:**

Supplementary Text  
Supplementary Materials and Methods  
Figures S1 to S10  
Legends for Movies S1 to S3  
SI References

#### **Other supplementary materials for this manuscript include the following:**

Movie S1  
Movie S2  
Movie S3

## 1. Supplementary Text

### 1.1 Sequences used in in vitro work (including His tag and XhoI restriction site).

LAF-1 RGG WT [Highlighted residues: 21-30 (red); 82-91 (blue); 101-110 (green)]:

MESNQSNNGG SGNAALNRGG **RYVPPHLRGG** DGGAAAAASA GGDDRRGGAG GGGYRRGGGN SGGGGGGGYD  
 RGYNDNRDDR **DNRGGSGGYG** **RDRNYEDRGY** **NGGGGGGGNR** GYNNNRGGGG GGYNRQDRGD GGSSNFSRGG  
 YNNRDEGSDN RGSGRSYNND **RRDNGGDGLE** HHHHHH

LAF-1 RGG  $\Delta$ 21-30:

MESNQSNNGG SGNAALNRGG DGGAAAAASA GGDDRRGGAG GGGYRRGGGN SGGGGGGGYD RGYNDNRDDR  
 DNRGGSGGYG RDRNYEDRGY NGGGGGGGNR GYNNNRGGGG GGYNRQDRGD GGSSNFSRGG YNNRDEGSDN  
 RGSGRSYNND RRDNGGDGLE HHHHHH

LAF-1 RGG  $\Delta$ 82-91:

MESNQSNNGG SGNAALNRGG RYVPPHLRGG DGGAAAAASA GGDDRRGGAG GGGYRRGGGN SGGGGGGGYD  
 RGYNDNRDDR DDRNYEDRGY NGGGGGGGNR GYNNNRGGGG GGYNRQDRGD GGSSNFSRGG  
 YNNRDEGSDN RGSGRSYNND RRDNGGDGLE HHHHHH

LAF-1 RGG  $\Delta$ 101-110:

MESNQSNNGG SGNAALNRGG RYVPPHLRGG DGGAAAAASA GGDDRRGGAG GGGYRRGGGN SGGGGGGGYD  
 RGYNDNRDDR DNRGGSGGYG RDRNYEDRGY GYNNNRGGGG GGYNRQDRGD GGSSNFSRGG YNNRDEGSDN  
 RGSGRSYNND RRDNGGDGLE HHHHHH

LAF-1 RGG<sub>shuf</sub>:

MNNSGDNDRG SGNYGLRNSF GDDGYGDNGN DEGNSGYRNR GLGGDRADEY GNSGGNGDNE AAPNASDRDD  
 AHYYDSDDYD DGGGGRGS GG AGGGGARGPG SNRAGRYGGG GRRGRGRNG YNGNRSQRRR GGGRGRGNRG  
 YRVGNNGQS GGRNSRGGGG GNGGANYGLE HHHHHH

LAF-1 RGG<sub>shuf-pres</sub>:

MGGYGYGSSG DGGGDDYDGA **RYVPPHLRGY** GDGAGDDGGD NNDDSDDADR DYNGGLS GGA GNSGGDGEN  
 GGDGNGRNNA RSGNNRGGNG NYRYFGANYG AGEGRGRNGQ GGE GSGNNRG GGGRYGRRR QGSRGGRGS  
 GNYGGNSNRS GRAGGRDNNA RNRRRNGSLE HHHHHH

LAF-1 RGG<sub>shuf-control</sub>:

MSGGARNRS GSNGGGHFSG GRGGYGYGDG QYRDAGGSAR RDDGNGGGGG RENGDNRYSY QLGNRGDYAN  
 NGSAGGDGGN GGRDGDRGES RDNDRDRGER GGSRRNGVNVN AGGYAGRDP NGNNGYDNGY GGYGRNGSR  
 GADGGRDGNL GNARSNDGGD RRNGPGGSLE HHHHHH

LAF-1 RGG R to K:

MESNQSNNGG SGNAALNKGG KYVPPHLKGG DGGAAAAASA GGDDKKGGAG GGGYKKGGGN SGGGGGGGYD  
 KGYNDNKDDK DNKGGSGGYG KDKNYEDKGY NGGGGGGGNK GYNNNKGGGG GGYNKQDKGD GGSSNFSKGG  
 YNNKDEGSDN KGS GKS YNND KKDNGGDGLE HHHHHH

LAF-1 RGG Y to F:

MESNQSNNGG SGNAALNRGG RFVPPHLRGG DGGAAAAASA GGDDRRGGAG GGGFRRGGGN SGGGGGGGFD  
 RGFNDNRDDR DNRGGSGGFG RDRNWEDRGF NGGGGGGGNR GFNNNRGGGG GGFNRQDRGD GGSSNFSRGG  
 FNNRDEGSDN RGSGRSFNND RRDNGGDGLE HHHHHH

### 1.2 LAF-1 homologs used in sequence alignment (accession numbers)

LAF-1, *C. elegans* (NP\_001254859.1):

MESNQSNNGG SGNAALNRGG RYVPPHLRGG DGGAAAAASA GGDDRRGGAG GGGYRRGGGN SGGGGGGGYD  
 RGYNDNRDDR DNRGGSGGYG RDRNYEDRGY NGGGGGGGNR GYNNNRGGGG GGYNRQDRGD GGSSNFSRGG  
 YNNRDEGSDN RGSGRSYNND RRDNGGDGQN TRWNNLDAPP SRGTSKWENR GARDERIEQE LFSGQLSGIN

FDKYEEIPVE ATGDDVPQPI SLFSDLSLHE WIEENIKTAG YDRPTPVQKY SIPALQGGRD LMSCAQTGSG  
 KTA AFLVPLV NAILQDGPDA VHRSVTSSGG RKKQYPSALV LSPTRELSLQ IFNESRKFAY RTPITSALLY  
 GGRENKQDI HKLRLGCHIL IATPGRLIDV MDQGLIGMEG CRYLVLDEAD RMLDMGFEPQ IRQIVECNRM  
 PSKEERITAM FSATFPKEIQ LLAQDFLKEN YVFLAVGRVG STSENIMQKI VWVEEDEKRS YLMDLLDATG  
 DSSLTLVFVE TKRGASDLAY YLNRQNYEVV TIHGDLKQFE REKHLDLFRT GTAPILVATA VAARGLDIPN  
 VKHVINYDLP SDVDEYVHRI GRTGRVGNVG LATSFFNDKN RNIARELMDL IVEANQELPD WLEGMSGDMR  
 SGGGYRGRGG RGNGQRFQGR DHRYQGGSGN GGGGNGGGGG FGGGQSRSGG GGGFQSGGGG GRQQQQQORA  
 QPQQDWWS

**DDX3X, *H. sapiens* (NP\_001180345.1):**

MSHVAVENAL GLDQQFAGLD LNSSDNQSGG STASKGRYIP PHLRNREATK GFYDKDSSGW SSSKDKDAYS  
 SFGSRSDSRG KSSFFSDRGS GSRGRFDDRG RSDYDGIGSR GDRSGFGKFE RGGNSRWCDK SDEDDWSKPL  
 PPSERLEQEL FSGGNTGINF EKYDDIPVEA TGNNCPPHIE SFSDVEMGEI IMGNIELTRY TRPTPVQKHA  
 IPIIKEKRD LMACAQTGSGK TAAFLLPILS QIYSDGPGEA LRAMKENGRI GRRKQYPIISL VLAPTRELAV  
 QIYEEARKFS YRSRVRPCVV YGGADIGQQI RDLERGCHLL VATPGRLVDM MERGKIGLDF CKYLVLDEAD  
 RMLDMGFEPQ IRRIVEQDTM PPKGVRHTMM FSATFPKEIQ MLARDFLDEY IFLAVGRVGS TSENITQKVV  
 WVEESDKRSF LLDLLNATGK DSLTLVVFVET KKGADSLEDF LYHEGYACTS IHGDRSQDRR EEALHQFRSG  
 KSPILVATAV AARGLDISNV KHVINFDLPS DIEEYVHRIG RTGRVGNLGL ATSFNERNI NITKDLLDL  
 VEAKQEVPSW LENMAYEHY KGSRRGRSRS RFSGGFGARD YRQSSGASS SFSSSRASS RSGGGGHGSS  
 RGFGGGGYGG FYNSDGYGGN YNSQGVDDWG N

**DEAD box helicase 3b isoform 5X, *D. rerio* (XP\_005168849.1)**

MSHVAVENVH GLDQQLAALD LSSADVQGVV GRRYIPPHLR NKEAAKNDAF GGWDNGRSNG FVNGYHDGRD  
 NRMNGGSSFA GRGPIRSDRG GRGGFRGKST ASYNPIQPMQ SAGFGYDNKE AGGWNVPKDN AYNSFGGRSD  
 RGKSSFFNDR GSSSRGRYER GGFGGGGNSR WVEECRDEDW SKPLPPNERL EHELFSGSNT GINFEKYDDI  
 PVEATGHNGP QPIDRFHDL MGEIIMGNI LSRYTRPTPV QKHAIPIIKS KRDLMACAQT GSGKTAFL  
 PVLSQIYTDG PGEALQAAKN SAQENGKYGR RKQYPIISLV APTRELALQI YDEARKFSYR SHVRPCVVY  
 GADIGQQIRD LERGCHLLVA TPGRLVDMME RGKIGLDYCN YLVLDEADRM LDMGFEPQIR RIVEQDTMPP  
 KLRQTMMFS ATFPEIQIL ARDFLEDYIF LAVGRVGST ENITQKVVV EENDKRSFLL DLLNATGKDS  
 LTLVFVETKK GADALEDFLY REGYACTSIH GDRSQDRR ALHQFRSGRC PILVATAVAA RGLDISNVKH  
 VINFDLPSDI EEYVHRIGRT GRVGNLGLAT SFFNDKNGNI TKDLLDILVE AKQEVPSWLE SLAYEHQHS  
 SSRGRSKRFS GGFGARDYRQ NSSSGGGGFG GRGGRSTGGH GGNRFGGGG FGNFYSSDGY GGNYSQVDW  
 N

**DEAD-box helicase 3 X-linked L homeolog, *X. laevis* (NP\_001080283.1)**

MSHVAVENVL NLDQQFAGLD LNSADAESGV AGTKGRIYIP HLRNKEASRN DSNWDSGRGG NYINGMQDD  
 RDGRMNGYDR GGYGSRGTGR SDRGFYDREN SGWNSGRDKD AYSSFGSRGE RGKGSFLNDK GSGSRRPDES  
 RPDGFDGVDN RGNNSSFRGF DRGNSRWSDE RNEDDWSKP LAPNDRVEQE LFSGSNTGIN FEKYDDIPVD  
 ATGSNCPPI ECFQDVMGE IIMGNIQLTR YTRPTPVQKH APIIIIGKR LMACAQTGSG KTAFLLPIL  
 SQIYADGPGD AMKHLKDNDR YGRRKQFPLS LVLAPTRELA VQIYEEARKF AYRSRVRPCV VYGGADIGQQ  
 IRDLERGCHL LVATPGRLVD MMEGKIGLD FCKYLVLEA DRMLDMGFEP QIRRIVEQDT MPPKGVRQTM  
 MFSATFPKEI QILARDFLDE YIFLAVGRVG STSENITQKV VWVEEMDKRS FLLDLLNATG KDSLTLVFVE  
 TKKGDALED FLYHEGYACT SIHGDRSQDR REEALHQFRS GKCPILVATA VAARGLDISN VKHVINFDP  
 SDIEEYVHRI GRTGRVGNL LATSFFNEKN INITKDLLDL LVEAKQEVPS WLENMAYEQH HKSSSRGRSK  
 SRFSGGFAGK DYRQSSSAGS SFGSSRGGRS SGHGGSRAGF GYGGFYNSD GYGGNYGGSS QVDWGW

**Belle isoform B, *D. melanogaster* (NP\_001262379.1)**

MSNAINQNGT GLEQQVAGLD LGGGSADYSG PITSTSTNS VTGGVYVPPH LRGGGGNNA ADAESQGGQ  
 GQGQGFDSRS GNPRQETRD QSRGGGGGEY RGGGGGGRG FNRQSGDYGY GSGGGGRRGG GGRFEDNYNG  
 GEFDSRRGGD WNRSGGGGGG GRGFRGPSY RGGGGGSGSN LNEQTAEDGQ AQQQQPRND RWQEPERPA  
 FDGSEGGQSA GGNRSYNNRG ERGGGGYNSR WKEGGGSNVD YTKLGARDER LEVELFGVGN TGINFDKYED  
 IPVEATGQNV PPNITSFDDV QLTEIIRNNV ALARYDKPTP VQKHAIPIII NGRDLMACAQ TGSGKTAFL  
 VPILNQMYEL GHVPPPQSTR QYSRRKQYPL GLVLAPTREL ATQIFEEAKK FAYRSRMRPA VLYGGNNTSE  
 QMRELDGCH LIVATPGRLE DMITRGKVGL ENIRFLVLE ADRMLDMGFE QIRRIVEQL NMPPTGQRQT  
 LMFSATFPKQ IQELASDFLS NYIFLAVGRV GSTSENITQT ILWVYEPDKR SYLLDLLSSI RDGPEYTKDS  
 LTLIFVETKK GADSLEEFY QCNHPVTSIH GDRTQKERE ALRCFRSGDC PILVATAVAA RGLDIPVVKH  
 VINFDLPSDV EEYVHRIGRT GRMGNLGVAT SFFNEKNRNI CSDLLELLIE TKQEIPIPSFME DMSSDRGHGG

AKRAGRGGGG RYGGGFGRD YRQSSGGGG GRSPPPRSG GSGSGGGGS YRSNGNSYK FGGNSGGGGY  
YGGGAGGGSY GGSYGGGSAS HSSNAPDWWA Q

#### DDX3X-like RNA helicase, *E. pallida* (XP\_020899200.1)

MSHVAPGNQQ SLDQRFAGLD LNSGVGNPD AGHNQRQORY VPPHLRRNPQ ELFHNDPRNP VNFPSGGAPQ  
QFQGGGRDGA FRGMNYGGKY NNFGGGGGYG GGGGGYGGRG GYGGAGYRRG GGGGNWRERG GNMYWGNNSG  
YDDRDSYAKT ARPEDWSKLL PKNDRIEREL FGGHNTGINF EKYDDIPVEA TGQDCPQNE SFTDVDLGEI  
LTHNIQLANY SKPTPVQKYA IPIVKHKRDL MACAQTGSGK TAAFLIPILS RIYQEGPPPA PDAKHTSRRR  
QYPVCLVLAP TRELAVQIFD EARKFAYCSL VRPCVVYVYGA DIGSQLRELD RGCHLLVATP GRLVDMMDRG  
RIGLDVIKFL VLDEADRMLD MGFEPQIRRI VDQDTMPKAG DRQTLMFSAF FPKEIQILAR DFLDNYIFLA  
VGRVGTSEN ITQKIVWVDE YDKRSFLLDL LNASGPDALT LVFVETKKA DSLELFLYKGR GYQCTSIHGD  
RSQSEREEAL RSFRSGKTP I LVATAVAARG LDINNVRHVI NFDLPSDIEE YVHRIGRTGR VGHTGLATSF  
FNEKNKNVAK DLLSLVTETG QEVPSWLESI AYESNQNKR GPRRYGGFGG SRDYRQQRGN SAQMNQMHGY  
GGYGGGGGGY MHYGGYSGG GGGGSGGRYH GGGGGGGGQD WNN

#### Hypothetical protein, *M. brevicolis* (XP\_001747837.1)

MSNGANPNNGS DLSQHMDLDT LTKTKPSGGS RYVPPHLRNR QPSGPAPPSG GRTAAPPVSA PPPSSNNGGR  
DFGSSRPPRG SRDGSRDMGG SRPPRDGGRG GSWDVQPRFQ QEDWTRPLKR NERMEEELFG SNHRTGGINF  
EKYDDIPVEA SGNNVPAHIS EFATAGLCEL MTGNLELARY TVPTPVQKYS IPIVQAKRDL MACAQTGSGK  
TAAFLVPILN RVYETGPVPP PPNARRSQF PVALILAPTR ELAIQIYGEA QKFSYRSRVR ICCVYGGASP  
RDQIQDLRRG CQLLVATPGR LVDFMERSVI GLDSIRFLVL DEADRMLDMG FEPQIRRIVE EDNMPQVGIR  
QTLMFSAF KDIQMLAQDF LDDYVHLSVG RVGSTSENIQ QIVHWIDEAD KRPSLLDLIS AASSEDLFLI  
FVETKKAADA LEYLLTMQGR PATSIHGDRT QYEREEALAD FRAGRRLV ATAVAARGLD IPNVKHVINF  
DLPSDIDEYV HRIGRTGRAG HKGTAVSFFN DKNRNVARDL LN

#### Dbp1p, *S. cerevisiae* (AJW08300.1)

MADLPQKVSNS LSINNKENG DGGKSSYVPP HLSRSGKPSF ERSTPKQEDK VTGGDFFRA GRQTGNNGGF  
FGFSKERNNG TSANYNRGGS SNYKSSGNRW VNGKHIPGPK NAKLEAELFG VHDDPDYHSS GIKFDNYDDI  
PVDASGKDV EPILDFSSPP LDELLMENIK LASFTKPTPV QKYSIPIVTK GRDLMACAQT GSGKTGGFLF  
PLFTELRFRSG PSPVPEKAS FYSRKGYP SA LVLAPTRELA TQIFEEARKF TYRSWVRPCV VYGGAPIGNQ  
MREVDRCDDL LVATPGRLND LLERGVSLA NIKYLVLEDEA DRMLDMGFEP QIRHIVECD MPSVENRQTL  
MFSATFPVDI QHLARDFLDN YIFLSVGRVG STSENITQRI LYVDDMDKKS ALLDLSAEH KGLTLIFVET  
KRMADQLTDF LIMQNFKATA IHGDRTQAER ERALSAFKAN VADILVATAV AARGLDIPNV THVINYDLPS  
DIDDYVHRIG RTGRAGNTGV ATSFNNSNQ NIVKGLMEIL NEANQEVPTF LSDLSRQNSR GGRTRGGGGF  
FNSRNNGSRD YRKHGGSGSF GSTRPRNTGT SNWGSIGGGF RNDNEKNGYG SSNASWW

#### Sum3, *S. pombe* (NP\_588033.1)

MSDNVQQQVD SVGSVTEKLQ KTNISRPRKY IPPFARDKPS AGAAPAVGDD ESVSSRGSSR SQTPEFSSN  
YGGREYNRG GHYGGGEGRQ NNYRGGREGG YSNGGGYRNN RGFGQWRDQ HVIGARNTLL ERQLFGAVAD  
GTKVSTGINF EKYDDIPVEV SGGDIEPVNE FTSPPLNSHL LQNIKLSGYT QPTPVQKNSI PIVTSGRDLM  
ACAQTGSGKT AGFLFPILSL AFDKGPAAVP VDQDAGMGYR PRKAYPTTLI LAPTRELVQC IHEESRKFCY  
RSWVRPCAVY GGADIRAQIR QIDQGC DLLS ATPGRLVDLI DRGRISLANI KFLVLDEADR MLDMGFEPQI  
RHIVEGADMT SVEERQTLMF SATFPRDIQL LARDFLKDYV FLSVGRVGST SENITQKVH VEDSEKRSYL  
LDILHTLPPE GLTLIFVETK RMADTLTDYL LNSNFPATSI HGDRTQRERE RALELFRSGR TSIMVATAVA  
SRGLDIPNVT HVINYDLPTD IDDYVHRIGR TGRAGNTGQA VAFFNRNNGK IAKELIELLQ EANQECPSFL  
IAMARESSFG GNGRGGRYSG RGGRGGNAYG ARDFRRPTNS SSGYSSGPSY SGYGGFESRT PHHGNTYNSG  
SAQSWW

### 1.3 Homolog sequence alignment

|                |                                                              |    |
|----------------|--------------------------------------------------------------|----|
| NP_001254859.1 | -----MESN--QS---NNGGSGNAALNRGGRYVPPHLRGGDGGAAA               | 36 |
| NP_001262379.1 | MSNAINQNGTGLEQQVAGLDLNGGSADYSGPITSKTSTNSVTTGGVYVPPHLRGGGGNNA | 60 |
| XP_001747837.1 | MSNGANPNNGSDLQHMADLDTKTKP-----SGGSRYVPPHLRNRQPSGPA           | 46 |
| XP_020899200.1 | MSHVAPGNQQSLDQRFAGLDLNSGVGNPD-----DAGHNQRQORYVPPHLRRNPQELFH  | 54 |
| XP_005168849.1 | MSHVAVENVHGLDQQLAALDLSADV--Q-----G---VTGRRYI PPHLRNKEAARN-   | 47 |
| NP_001180345.1 | MSHVAVENALGLDQQFAGLDLNSSDN--Q-----SGGSTASKGRYI PPHLRNREA---- | 48 |
| NP_001080283.1 | MSHVAVENVNLNDQQFAGLDLNSADA--E-----SG-VAGTKGRYI PPHLRNKEASRN- | 50 |

```

AJW08300.1      MAD-----LPQKVSNLS-I-----N-NKENGDDGGKSSYVPPHLRSRGKPSFE      41
NP_588033.1     MSDN-----VQQQVDSVGSV-----TEKLQKTNISRPKYIPPFARDKPSAGAA      44
                :                                     *:*:*
NP_001254859.1  AASAGDDRRGGAGGGGYRRG-----GGNS-----                        61
NP_001262379.1  ADAESQGQGG--GQGQGFDSRSNGNRQETRDQPQSRGGGGGEYRRGGGGGGRGFNRQSGDY      118
XP_001747837.1  ---PPS---GGRTAAPVVS-----A-----                                60
XP_020899200.1  NDPRNPVNFPSGGAPQQFQGG-----GRDGAFRGMNYGG-----                88
XP_005168849.1  ---DAPGGWDNGR-SNGFVNG-----YHDGRDNRMMGGSSF---AGRG            83
NP_001180345.1  -----                                        -----                48
NP_001080283.1  ---DS--NWDSDRGNGYING-----MQDDRDRMNGYDR-----                80
AJW08300.1      RSTPKQED-----KV-----                                        51
NP_588033.1     PAVGDDESIVSSR-----GSSRSQ-----                                62

NP_001254859.1  ---GGGGGG---YDRGYNDRDD-----RDNRGGSGGYGRDRNY                    95
NP_001262379.1  GYSGGGGRRGGGRFEDNY-----NGGFDSRRGGDWNRSGGGGGGGRGFRGSPSY      170
XP_001747837.1  PPPSSNGG-----GRDFGSSRFP-----                                78
XP_020899200.1  -----KYNNFSGGGGY-----                                        99
XP_005168849.1  PIRSDRGGRRGGRKSTASYNPIQPMQSAGFGYDNKEAGGWNVPKD--NAYNSFGGRSD-    140
NP_001180345.1  -----TKGFYDKDSSGWSKDK--DAYSSFGRSDS-----                    78
NP_001080283.1  ---G---GYGSRG-----TGRSDRGFYDRENSGWNSSGRDK--DAYSSFGRSGE-    120
AJW08300.1      -----TGGDF-----FR-RAGRQTG-----                            65
NP_588033.1     -----TPSEF-----SSNYGGREY-----                            77

NP_001254859.1  EDRGYNGGGGGGNRYNNRGGGGG-----YNRQDRGDGSSNFSRGGYNNRDEGSDN      150
NP_001262379.1  -----RGGG---GGSNSLNQTAEDGQAQQQQPRNDRWQEPERPAFGDGESEGG-QS    219
XP_001747837.1  ---RGSR---D-----G-----                                        84
XP_020899200.1  ---GGG---GGYG---G-----RGGYGGAG-----                            116
XP_005168849.1  ---RGKS---SFFN---DRGSS-----SRGRYER-----                    160
NP_001180345.1  ---RGKS---SFFS---DRGSG-----SRGRFDRGRSDYDYGIG-----        108
NP_001080283.1  ---RGKG---SLFN---DKGSG-----SRRP-DESRPDGFDGVG-----        149
AJW08300.1      NNGGFF-----GFSKERNG-----GT-----                            81
NP_588033.1     NRGGHYGGG---EGRQNNYRG-----GR-----                            97

NP_001254859.1  RGSGRSYNNDRRDNGGDQNTNRWNNLDA-----PPSRGTSKWENRGARDERIEQELFS    203
NP_001262379.1  AGGNRSYNN-RGERGGGYNSRWKE-----GGGSNDVYTKLGARDERLEVELFG        267
XP_001747837.1  ---SRDMGG-SRPPRDGGRGGSWDV-----QPRFQQEDWTRPLKRNERMEEELFG      130
XP_020899200.1  ---YRRGGG-GGNWRERGGNNYWGNNSGYDDDRDSYAKTARPEWSKLLPKNDRIERELFG    172
XP_005168849.1  -----GGFGGGNSRWV-----EEC-RDEDWSKPLPPNERLEHELFS            196
NP_001180345.1  ---SRGDRS-GFGKFERGGNSRWC-----DKSDEDDWSKPLPPSERLEQELFS        152
NP_001080283.1  ---NRGNNS-SFGRFDRGN-SRWS-----DERNDEDWSKPLAPNDRVEQELFS        193
AJW08300.1      ---SANYNR-GGSSNYKSSGNRWVN-----GKHIPGPKNAKLEAELFG            120
NP_588033.1     ---EGGYSN-GGGRNRRGFGQWRD-----GQHVI GARNTLLERQLFG            136
                *                                     . : * : **

NP_001254859.1  GQ-----LSGINFDKYEEIPVEATGDDVPPQIPISLFDLSLHEWIEENIKTAGYDRPTPV    257
NP_001262379.1  VG-----NTGINFDKYEDI PVEATGQNVPPNITSFDDVQLTEI IRNNVALARYDKPTPV    321
XP_001747837.1  SNH---RTGGINFKEYDDIPVEASGNVPAHISEFATAGLCELMTGNLELARYTVPTPV      186
XP_020899200.1  GH-----NTGINFEKYDDIPVEATGQDCPQNI ESFTDVDLGEILTHNIQLANYSKPTPV    226
XP_005168849.1  GS-----NTGINFEKYDDIPVEATGHNGPQPIDRFHDLMEGEI IMGNIINLSRYTRPTPV    250
NP_001180345.1  GG-----NTGINFEKYDDIPVEATGNCCPHIESFSFSDVEMGEI IMGNIELTRYTRPTPV    206
NP_001080283.1  GS-----NTGINFEKYDDIPV DATGNSCCPHIECFQDVMGEI IMGNIQLTRYTRPTPV    247
AJW08300.1      VHDDPDYHSSGKIFDNYDDIPVDASGKDVPPEPILDFSSPPLDELLMENIKLASFTKPTPV    180
NP_588033.1     AVADGTKVSTGINFEKYDDIPVEVSGGDI-EPVNEFTSPPLNSHLLQNIKLSGYTQPTPV    195
                **:*:*:*:*:*:*:*:* : : * : : : * : : : ****

NP_001254859.1  QKYSIPALQGGRDLMSCAQTGSGKTA AFLVPLVNAI LQDGPDAVHRSVT-----SSGGR    311
NP_001262379.1  QKHAIPI I INGRDLMACAQ TGSGKTA AFLVPI LNQMYELGHVPPPQST-----RQYSR    374
XP_001747837.1  QKYSIPIVQAKRDLMACAQ TGSGKTA AFLVPI LNRVYETGPVPPPNA-----RR      236
XP_020899200.1  QKYAIPIVKHKRDLMACAQ TGSGKTA AFLPI LLSRIYQEGPPAPDA-----KHTSR    278
XP_005168849.1  QKHAIPI I KSKRDLMACAQ TGSGKTA AFLPLVLSQIYTDGPGALQA AKNSAQENGYGR    310
NP_001180345.1  QKHAIPI I KEKRDLMACAQ TGSGKTA AFLLPILS QIYSDGPGALRAM---KENGRYGR    262
NP_001080283.1  QKHAIPI I I GKRDLMACAQ TGSGKTA AFLPLPILS QIYADGPGDAMKHL---KDNRYGR    303
AJW08300.1      QKYSIPIVTKGRDLMACAQ TGSGKTTGGFLFPLFTELFRSGPSVPEKA-----QSFYS    233
NP_588033.1     QKNSIPIVTSGRDLMACAQ TGSGKTAGFLFPI LSLAFDKGPAAVPVDQ---DAGMGYRP    251
                ** : ** : **** : ***** . ** . * . *

NP_001254859.1  KKQYPSALVLSPTRELSLQIFNESRKFAYRTPITSALLYGGRENYKDQIHKLRGCHILI      371

```

|                |                                                               |     |
|----------------|---------------------------------------------------------------|-----|
| NP_001262379.1 | RKQYPLGLVLAPTRELAQIFEEAKKFAYRSRMRPAVLYGGNN-TSEQMRELDRCGLLIV   | 433 |
| XP_001747837.1 | SQQFPVALILAPTRELAQIYGEAQKFYSYRSRVRICCVYGGAS-PRDQIQDLRRGCQLLV  | 295 |
| XP_020899200.1 | RRQYPVCLVLAPTRELAQVIFDEARKFAYCSLVRPCVVYGGAD-IGSQLRELDRCGLLIV  | 337 |
| XP_005168849.1 | RKQYPIISLVLAPTRELAQIYDEARKFYSYRSRVRPCVVYGGAD-IGQQIRDLERGCHLLV | 369 |
| NP_001180345.1 | RKQYPIISLVLAPTRELAQIYEEARKFYSYRSRVRPCVVYGGAD-IGQQIRDLERGCHLLV | 321 |
| NP_001080283.1 | RKQFPPLSLVLAPTRELAQIYEEARKFAYRSRVRPCVVYGGAD-IGQQIRDLERGCHLLV  | 362 |
| AJW08300.1     | RKGYPSALVLAPTRELAQIYEEARKFAYRSRVRPCVVYGGAP-IGNQMREVDRGCDLLV   | 292 |
| NP_588033.1    | RKAYPTTLILAPTRELVQIHEESRKFYRSRVRPCAVYGGAD-IRAQIRQIDQGCDDLS    | 310 |
|                | : :* *:*:***** ** .*:** * : : . :*** *::: **:::               |     |
| NP_001254859.1 | ATPGRLLIDVMDQGLIGMEGCRYLVLDEADRMLDMGFEPQIRQIVECNRMPSKEERITAMF | 431 |
| NP_001262379.1 | ATPGRLEDMITRGKVGLENIRFLVLDEADRMLDMGFEPQIRRIVEQLNMPPTGQRQTLMF  | 493 |
| XP_001747837.1 | ATPGRLVDFMERGVIGLDSIRFLVLDEADRMLDMGFEPQIRRIVEEDNMPQVGIQTLMF   | 355 |
| XP_020899200.1 | ATPGRLVDMMDRGRIGLDVIFLVLDEADRMLDMGFEPQIRRIVDQDTMPKAGDRQTLMF   | 397 |
| XP_005168849.1 | ATPGRLVDMMERGKIGLDYCNLVLDEADRMLDMGFEPQIRRIVEQDTMPPKGLRQTLMF   | 429 |
| NP_001180345.1 | ATPGRLVDMMERGKIGLDFKYLVLDEADRMLDMGFEPQIRRIVEQDTMPPKGVRTMMF    | 381 |
| NP_001080283.1 | ATPGRLVDMMERGKIGLDFCKYLVLDEADRMLDMGFEPQIRRIVEQDTMPPKGVRTMMF   | 422 |
| AJW08300.1     | ATPGRVLDLLERKVLANIKYLVLDEADRMLDMGFEPQIRHIVEECMPSVENRQTLMF     | 352 |
| NP_588033.1    | ATPGRVLDLIDRGRISLANIKFLVLDEADRMLDMGFEPQIRHIVEGADMTSVEERQTLMF  | 370 |
|                | ***** *.: *: :.: .:*****:****: * * * *                        |     |
| NP_001254859.1 | SATFPKEIQLLAQDFLKENYVFLAVGRVGTSTENIMQKIVVWVEEDEKRSYLMDDLAT--  | 489 |
| NP_001262379.1 | SATFPKQIQELASDFLS-NYIFLAVGRVGTSTENITQTILWVYEPDKRSYLLDLLSSIRD  | 552 |
| XP_001747837.1 | SATFPKDIQMLAQDFLD-DYVHLSVGRVGTSTENIQQIVHWIDEADKRPSELLDLSAA--  | 412 |
| XP_020899200.1 | SATFPKEIQILARDFLD-NYIFLAVGRVGTSTENITQKIVVWVEYDKRSFLLDLLNAS--  | 454 |
| XP_005168849.1 | SATFPKEIQILARDFLE-DYIFLAVGRVGTSTENITQKVVVVEENDKRSFLLDLLNAT--  | 486 |
| NP_001180345.1 | SATFPKEIQMLARDFLD-EYIFLAVGRVGTSTENITQKVVVVEESDKRSFLLDLLNAT--  | 438 |
| NP_001080283.1 | SATFPKEIQILARDFLD-EYIFLAVGRVGTSTENITQKVVVVEEMDKRSFLLDLLNAT--  | 479 |
| AJW08300.1     | SATFPVDIQHLARDFLD-NYIFLSVGRVGTSTENITQRIYVDDMDKKSALLDLLSA---   | 408 |
| NP_588033.1    | SATFPQDIQHLARDFLD-DYVFLSVGRVGTSTENITQKVVHVVEDSEKRSYLLDILHTL-- | 427 |
|                | ***** :** ** ** . :*: :***** * : : : *: *::: :                |     |
| NP_001254859.1 | ---GDSSLTLVFVETKRGASDLAYYLNRQNYEVVTHIGDLKQFEREKHLDFRTGTAPI    | 545 |
| NP_001262379.1 | GPBYTKDSLTLFVETKKGADSLLEEFYQCNEHVPVTSIHGDRQKEREALRCFRSGDCPI   | 612 |
| XP_001747837.1 | ---SSEDLFLIFVETKKAADALEYLLTMQGRPATSIHGDRQYEREALADFRAGRPI      | 468 |
| XP_020899200.1 | ---GPDALTLVFVETKKGADSLLEFLYKDGCTSIHGDRSQSEREALRSFRSGKTFPI     | 510 |
| XP_005168849.1 | ---GKDSLTLVFVETKKGADALEDFLYREGYACTSIHGDRSQDREREALHQFRSGRCP    | 542 |
| NP_001180345.1 | ---GKDSLTLVFVETKKGADSLLEDFLYHEGYACTSIHGDRSQDREREALHQFRSGKSP   | 494 |
| NP_001080283.1 | ---GKDSLTLVFVETKKGADALEDFLYHEGYACTSIHGDRSQDREREALHQFRSGKCP    | 535 |
| AJW08300.1     | ---EHKGLTLFVETKRMADQLTDFLIMQNFKATAIHGDRQAEERERALSFAKNAVADI    | 464 |
| NP_588033.1    | ---PPEGLTLFVETKRMADTLTDYLLNSNFPATSIHGDRQREERERALELFRSGRTSI    | 483 |
|                | . * * :*****: * . * : * . :***** . * : ** . * *::: *          |     |
| NP_001254859.1 | LVATAVAARGLDIPNVKHVINYDLPSDVEYVHRIGRTGRVGNVLGATSFNDKNRNIAR    | 605 |
| NP_001262379.1 | LVATAVAARGLDIPNVKHVINFDLPSDVEEYVHRIGRTGRMGNLGATSFNEKNRNIC     | 672 |
| XP_001747837.1 | LVATAVAARGLDIPNVKHVINFDLPSDIDYVHRIGRTGRAGHKTAVSFNDKNRNVAR     | 528 |
| XP_020899200.1 | LVATAVAARGLDINNVRHVINFDLPSDIEEYVHRIGRTGRVGHGTGLATSFNEKNKNVAK  | 570 |
| XP_005168849.1 | LVATAVAARGLDISNVKHVINFDLPSDIEEYVHRIGRTGRVGNLGLATSFNDKNINIK    | 602 |
| NP_001180345.1 | LVATAVAARGLDISNVKHVINFDLPSDIEEYVHRIGRTGRVGNLGLATSFNERNINIK    | 554 |
| NP_001080283.1 | LVATAVAARGLDISNVKHVINFDLPSDIEEYVHRIGRTGRVGNLGLATSFNEKNINIK    | 595 |
| AJW08300.1     | LVATAVAARGLDIPNVTHVINYDLPSDIDYVHRIGRTGRAGNTGVAATSFNSNNQIVAK   | 524 |
| NP_588033.1    | MVATAVAARGLDIPNVTHVINYDLPTDIDYVHRIGRTGRAGNTGQAVAFFNRNKNKGIK   | 543 |
|                | :*****:***** :* *****:****: :*****: * * * :**** * * .:        |     |
| NP_001254859.1 | ELMDLIVEANQELPDWLEGMMSGDMRSGGGYRGRGGG---NGQRFGGRDHRYPQGGSGNG  | 661 |
| NP_001262379.1 | DLELLIETKQEIPIFSFMDMSSDRGHGGAKRAGRGGG---GRYGGGFGRDYRQSSGGGGG  | 730 |
| XP_001747837.1 | DLLN-----                                                     | 532 |
| XP_020899200.1 | DLLSLVTETGQEVPSWLESIAYESNQNSKRG-----P---RRYGGFGGRDYRQQRGNSAQ  | 623 |
| XP_005168849.1 | DLLDLILVEAKQEVPSWLESILAYEHQHKSRSRG---RSK---RFSGGFGRDYRQSSGGG  | 657 |
| NP_001180345.1 | DLDDLVEAKQEVPSWLENMAYEHYKGSRSRG---RSK---SRFGGFGRDYRQSSGASS    | 610 |
| NP_001080283.1 | DLDDLVEAKQEVPSWLENMAYEQHKSRSRG---RSK---SRFGGFGRDYRQSSAGSS     | 651 |
| AJW08300.1     | GLMEILNEANQEVPTFLSDLRQNSRGGRTRGGGGF---FNSRNNGSRDYRKHGSSGSF    | 580 |
| NP_588033.1    | ELIPELLQEANQECPSFLIAMARESSFGNGRGGGRYSGRGGGNGAYGARDFRPTNSSSG   | 603 |
|                | *:.                                                           |     |
| NP_001254859.1 | GGG----NGGGGGFGGGG-----QRSGGG---GFQSGG---GGGRQQ               | 695 |
| NP_001262379.1 | GRSGPPPRSGGSGSGGGGGYSRS---NGNSYGFGGNSGGGGYGGGAGGGSYGGSYGGG    | 787 |
| XP_001747837.1 | -----                                                         | 532 |
| XP_020899200.1 | MNQM----HGYGGYGGGGGYMHY---GGYSG---GGGGGGSGGRYH----GGGGG       | 665 |
| XP_005168849.1 | -----GFGGRG---RSTGGHGNR---GFGGGFGNFYSSDYGGNY---               | 694 |
| NP_001180345.1 | -----SFSSSRASSRSRGGGGHSSR---GFGGGYGGFYNSDYGGNYS-              | 653 |

|                |                                                      |     |
|----------------|------------------------------------------------------|-----|
| NP_001080283.1 | -----FGSSRG----GRSSGHGSSR----AFG-GGYGGFYNSDGYGGNYGG- | 688 |
| AJW08300.1     | GSTRP-RNTGTSNWGSIIGGGFRND-----NEKNGYG--              | 610 |
| NP_588033.1    | YSSGP-SYSG---Y----GGFESRT-----PHHGNTYN--             | 628 |
|                |                                                      |     |
| NP_001254859.1 | QQQRAQPQQDWWS-                                       | 708 |
| NP_001262379.1 | SASHSSNAPDWWAQ                                       | 801 |
| XP_001747837.1 | -----                                                | 532 |
| XP_020899200.1 | -----GGGQDWWN-                                       | 673 |
| XP_005168849.1 | -----SQVDWWGN                                        | 702 |
| NP_001180345.1 | -----QGVDDWGN                                        | 661 |
| NP_001080283.1 | -----SSQVDWWGN                                       | 697 |
| AJW08300.1     | -----SSNASWW--                                       | 617 |
| NP_588033.1    | -----SGSAQSWW--                                      | 636 |

#### 1.4 High-throughput identification of contact-prone region

When conducting single-chain simulations of the many different deletion sequences, we note that many of them have a higher  $T_{\theta}$  than the full-length RGG, counter to the expectation that longer chain length generally favors LLPS. We believe this effect in the simulation model can be attributed to a subtle balance between the changes in hydrophobicity, net charge, and SCD rather than a single sequence descriptor (SI Appendix Figure 1Bii). Given the simplicity of our simulation model and the errors associated with predicting phase separation based solely on  $T_{\theta}$ , we can only distinguish sequences such as  $\Delta 21$ -30 which have more significant changes to LLPS behavior, but cannot capture smaller changes as with the other sequences without conducting additional extensive simulations on the phase behavior of these variants.

#### 1.5 Calculation of minimum possible SCD for sequence with same composition as LAF-1 RGG

To obtain a sequence with the minimum possible SCD value, the charged amino acids must be clustered at the very ends of the sequence with positive charges at one end, negative charges at the other, and uncharged amino acids in between. Since we consider histidine in our model to have a +0.5 charge, the +1 charged amino acids should be at the very end with histidine residues following.

We also must consider that for in vitro studies, the initial methionine residue and the LEHHHHHH tag must be conserved. Thus a sequence with minimum possible SCD is:

MDDDDDDDDDDDDDDDDDEEEE . . . . . HRRRRRRRRRRRRRRRRRRRRRRRRRRRLEHHHHHHH

with all of the uncharged residues in between the negatively-charged N-terminal and the positively-charged C-terminal, and having an SCD of -28.032. Note that since D and E have the same charge, any permutation of residues 2-21 would not change the SCD value.

The probability of randomly sampling a sequence with the minimum SCD value can be calculated by considering the number of residues being shuffled as  $176 - 9 = 167$ . Then one must consider the four regions that must be correct:

1. All D and E residues within 2-21
2. All R residues within 145-168
3. H residue at 144
4. All uncharged residues within 22-143

To account for these values and the degeneracies, we can calculate the probability of randomly sampling such a sequence as

$$P_{minSCD} = \frac{n_{DE}! \cdot n_{RK}! \cdot n_H! \cdot (n - n_{DE} - n_{RK} - n_H)!}{n!} = \frac{20! \cdot 24! \cdot 1! \cdot 122!}{167!} = 9.914 \times 10^{-56}$$

## 2. Supplementary Materials and Methods

### 2.1 Cloning

The WT, full-length LAF-1 gene was a gift of Shana Elbaum-Garfinkle and Clifford Brangwynne. WT RGG was amplified by PCR from LAF-1. All modified versions of the RGG domain were ordered as synthetic double-stranded DNA fragments (gBlocks; IDT). Plasmids were constructed using either In-Fusion cloning (Takara Bio) or NEBuilder HiFi DNA Assembly (New England BioLabs). For bacterial expression, genes were cloned into a pET vector in-frame with a C-terminal 6xHis-tag. For yeast expression, genes were cloned into the YIplac211 vector in frame with a C-terminal mEGFP (monomeric enhanced GFP) tag. YIplac211 is a yeast integrating plasmid with a URA3 marker<sup>1</sup>. Gene sequences were verified by Sanger sequencing (GENEWIZ).

### 2.2 Protein expression and purification

For bacterial expression, plasmids were transformed into BL21(DE3) competent *E. coli* (New England BioLabs). Colonies picked from fresh plates were grown for 8 h at 37 °C in 1 mL LB + 1% glucose while shaking at 250 rpm. This starter culture (0.5 mL) was then used to inoculate 0.5 L cultures. Cultures were grown overnight in 2L baffled flasks in Terrific Broth auto-induction medium (Formedium; supplemented with 4 g/L glycerol) at 37 °C while shaking at 250 rpm. The pET vectors used contained a kanamycin resistance gene; kanamycin was used at concentrations of 50 µg/mL in starter cultures and 100 µg/mL in the auto-induction medium<sup>2</sup>. After overnight expression, bacterial cells were pelleted by centrifugation. Pellets were resuspended in lysis buffer (1 M NaCl, 20 mM Tris, 20 mM imidazole, Roche EDTA-free protease inhibitor, pH 7.5) and lysed by sonication. Lysate was clarified by centrifugation at 15,000 × g for 30-60 minutes. Lysis was conducted on ice, but other steps were conducted at room temperature to prevent phase separation. Proteins were purified using an AKTA FPLC with 1 mL nickel-charged HisTrap columns (GE Healthcare Life Sciences) for affinity chromatography of the His-tagged proteins. The column was washed with 500 mM NaCl, 20 mM Tris, 20 mM imidazole, pH 7.5. Proteins were eluted with a linear gradient up to 500 mM NaCl, 20 mM Tris, 500 mM imidazole, pH 7.5. Proteins were dialyzed overnight using 7 kDa MWCO membranes (Slide-A-Lyzer G2, Thermo Fisher) into 500 mM NaCl, 20 mM Tris, pH 7.5 or 150 mM NaCl, 20 mM Tris, pH 7.5. Proteins were dialyzed at temperatures (25 °C -



42 °C) high enough to inhibit phase separation because phase-separated protein bound irreversibly to the dialysis membrane. Proteins were snap frozen in liquid N<sub>2</sub> in single-use aliquots and stored at -80 °C. For turbidity and microscopy experiments, protein samples were prepared as follows: Protein aliquots were thawed above the phase transition temperature. Proteins were then mixed with buffer (20 mM Tris, pH 7.5, 0 – 150 mM NaCl) to obtain solutions containing the desired protein and NaCl concentrations. Protein concentrations were measured based on their absorbance at 280 nm using a Nanodrop spectrophotometer (ThermoFisher). Proteins were mixed in a 1:1 ratio with 8 M urea to prevent phase separation during concentration measurements.

### **2.3 Turbidity assays**

Temperature-dependent turbidity assays were conducted using a UV-Vis spectrophotometer (Cary 100 Bio; Agilent) equipped with a multicell Peltier temperature controller. Protein samples were assayed in quartz cuvettes with 1 cm path length (Thorlabs). Samples were first equilibrated above the phase transition temperature (25-60 °C depending on the sample) and blanked. Then, the samples were cooled at a rate of 1 °C per minute until reaching 2 °C. Absorbance was measured at  $\lambda = 600$  nm every 0.5 °C throughout the temperature ramp. Upon cooling below the phase transition temperature, the samples changed from clear to turbid.

### **2.4 MALDI-TOF mass spectrometry**

Molecular weights of purified proteins were measured by matrix-assisted laser desorption/ionization time-of-flight (MALDI-TOF) mass spectrometry on an Ultraflextreme mass spectrometer (Bruker). Protein samples were applied as spots to an MPT 384 polished steel target plate. Spots consisted of 1  $\mu$ L protein solution (approximately 10  $\mu$ M protein in 50 mM NaCl) plus 1  $\mu$ L matrix solution (10 mg/mL sinapinic acid dissolved in a 50:50 acetonitrile:water mixture with 0.1% trifluoroacetic acid added).

### **2.5 SDS-PAGE and western blot**

For chromatographically purified proteins, SDS-PAGE was run using NuPAGE 4-12% Bis-Tris gels (Invitrogen) and stained using a Coomassie stain (SimplyBlue SafeStain; Invitrogen). For western blotting, yeast cells were lysed as follows<sup>3</sup>: Cell cultures were pretreated with 2 M lithium acetate for 5 minutes on ice, then with 0.4 M NaOH for 5 minutes on ice. The cell cultures were then resuspended in SDS sample buffer, heated at 95 °C for 5 minutes, and centrifuged to remove cell debris. The supernatant was stored at -80 °C until use. The supernatant was run on a Novex 10% Tris-Glycine gel, WedgeWell format (Invitrogen), then transferred to a nitrocellulose membrane (0.2 µm pore size). The membrane was then incubated with two primary antibodies: rabbit polyclonal antibody to GFP (Invitrogen, catalog #A11122) for detection of the GFP-tagged LAF-1 constructs, and mouse monoclonal antibody to PGK1 (Invitrogen, catalog #459250) as a loading control. Secondary antibodies used for detection were IRDye 680RD goat anti-rabbit IgG (LI-COR, catalog #926-68071) and IRDye 800CW goat anti-mouse IgG (LI-COR, catalog #926-32210). Blots were visualized on a LI-COR Odyssey CLx infrared imaging system.

## 2.6 Yeast transformation and yeast cultures

YIplac211 plasmids were prepared for yeast chromosomal integration by restriction digest with EcoRV, which cuts in the URA3 marker. Linearized plasmids were transformed into *S. cerevisiae* YEF473A strain<sup>4</sup> using the Frozen-EZ Yeast Transformation II Kit (Zymo Research). Transformed yeast cells were cultured at 30°C in uracil dropout synthetic defined medium (-Ura dropout supplement was purchased from Takara Bio). To induce expression of genes under the control of the GAL1 promoter, yeast cultures were first grown overnight in dropout medium + 2% glucose, then grown for 8-10 hours in dropout medium + 2% raffinose, and finally grown overnight in dropout medium + 2% galactose with a target OD<sub>600</sub> = 0.3 – 0.5 for imaging.

## 2.7 Microscopy: phase behavior, FRAP, and fusion

Imaging of temperature-dependent phase behavior in vitro and in yeast was performed on an Olympus IX81 inverted microscope equipped with a Yokogawa CSU-X1 spinning disk confocal unit and an iXon3 EMCCD camera (Andor). The microscope stage was outfitted with a Cherry Temp microfluidic temperature controller (Cherry Biotech), which enabled imaging samples over the temperature range 5 to

42 °C, with rapid switching (approximately 10 s) between temperature extremes. Imaging was conducted with a 100x/1.4 NA plan-apochromatic oil-immersion objective.

FRAP experiments were performed on a Zeiss Axio Observer 7 inverted microscope equipped with an LSM900 laser scanning confocal module and a 63x/1.4 NA plan-apochromatic oil-immersion objective. LAF-1 RGG and its variants were mixed with 5% of RGG-GFP-RGG, which partitions into the RGG droplets and serves as a FRAP probe<sup>5</sup>. GFP was imaged with a 488 nm laser and bleached with a 405 nm laser. Circular bleach regions of approximate radius  $R = 1.5 \mu\text{m}$  were drawn in the center of protein droplets whose radii were at least  $2.5R$ . Recovery curves were fit to an infinite boundary model in three dimensions to calculate the recovery timescale  $\tau^6$ . The diffusion coefficient was calculated as  $D = R^2/\tau$ . The same Zeiss microscope was used for droplet fusion experiments, but using brightfield transillumination and imaging onto an AxioCam 702 sCMOS camera at a frame rate of approximately 62 Hz. Droplet fusion was analyzed by first fitting the image of the fusing droplets to an ellipse and calculating the aspect ratio of the ellipse. The aspect ratio was then plotted against time and the decreasing portion of the curve was fit to an exponential decay to calculate the relaxation time<sup>7-9</sup>. The droplet length scale was defined as the radius of the droplet after completion of fusion, when the merged droplet was circular (aspect ratio 1). FRAP and droplet fusion experiments were conducted at room temperature of 16-18 °C using protein concentrations above  $c_{\text{sat}}$  at that temperature. Image analysis and data processing were performed in MATLAB.

All other imaging was performed on a Leica DMI8 inverted microscope equipped with a spinning disk confocal unit (Spectral Applied Research) and an sCMOS camera (Orca Flash 4.0; Hamamatsu) using a 63x/1.4 NA or 100x/1.4 NA plan-apochromatic oil-immersion objective.

For imaging purified RGG proteins, the protein samples were placed in chambers on glass coverslips (#1.5 glass thickness) that had been passivated for >1 hr by incubation with 5% Pluronic F127 (for FRAP and droplet fusion experiments) or bovine serum albumin. Coated coverslips were thoroughly rinsed with buffer prior to the addition of RGG protein solutions. For imaging yeast, the glass surface was pretreated by incubation with 0.4 mg/mL concanavalin A (ConA; Sigma) for 5-10 minutes. After removing the ConA solution, yeast was pipetted into the imaging chamber and allowed to settle for several minutes before imaging.

## 2.8 Coarse-grained simulations

Coarse-grained simulations were conducted using an amino-acid-resolution model with 20 residue types to capture sequence specificity, having interactions based on relative hydropathies of each amino acid. Each system was simulated at a range of temperatures using constant volume and temperature using a Langevin thermostat, following similar protocols to our previous work<sup>10</sup>. Simulations of phase coexistence were conducted using HOOMD-Blue v2.1.5 software package<sup>11</sup>.

## 2.9 All-atom simulations

Atomic-resolution simulations were conducted for systems containing either one or two copies of a 44-residue fragment of the LAF-1 RGG domain (RGG<sub>106-149</sub>). Simulations were of 44-residue fragments as we have found this size to be computationally tractable for single- and two-chain simulations in the previous studies<sup>12,13</sup>. We selected residues 106-149 by calculating the overall sequence composition of all possible 44-residue fragments and comparing them with the total composition of the 168-residue RGG domain (SI Appendix Fig. S5A). The region having the overall composition most similar to that of the full RGG domain was residues 106-149. Notably, this fragment contains 6 arginine and 3 tyrosine residues constituting 13.6% and 6.8% of the 44-residue sequence, comparable to the 14.3% and 6.5% composition in the full RGG (SI Appendix Fig. S5B,C).

Simulations were conducted with either a single RGG<sub>106-149</sub> chain solvated in explicit water and ~100 mM NaCl or two chains at the same conditions. We used a modified version of the state-of-the-art Amber99SBws force field<sup>14</sup> with improved residue-specific dihedral corrections, tip4p/2005 water<sup>15</sup> and improved salt parameters from Luo and Roux<sup>16</sup>. To efficiently sample the configurational ensemble and contacts between amino acid residues, we employed enhanced sampling using parallel tempering in the well-tempered ensemble (PT-WTE) which couples replica exchange molecular dynamics (REMD)<sup>17</sup> and well-tempered metadynamics<sup>18</sup> applied to the total system energy to enhance fluctuations and reduces the number of replicas required for good replica exchanges<sup>19</sup>. For two-chain simulations, we also applied a well-tempered metadynamics bias on the intermolecular VDW contacts between heavy nonpolar atoms (i.e.  $|q| < 0.25$ ) as we have done previously to improve sampling of binding and unbinding events<sup>13</sup>. Simulations were conducted using GROMACS 2016 software package<sup>20</sup> with PLUMED 2.4 plugin<sup>21</sup>.

We calculated the free energy surface of the two-chain systems from the metadynamics bias using the built-in function (sum\_hills) in PLUMED, and an alternative time-independent method from Tiwary and Parrinello<sup>22</sup>, then subtract the difference between the two results to generate error bars for SI Appendix Fig. S6A. Contact propensities in all-atom two-chain PT-WTE simulations were reweighted based on free energy surface.

VDW contacts were considered as any two heavy atoms being within 6 Å of each other. Hydrogen bonds were considered as a donor atom and an acceptor atom being within 3 Å and the donor-hydrogen-acceptor angle being larger than 120°. The  $sp^2/\pi$  interactions were calculated as presented by Vernon et al<sup>23</sup> and considered as any two  $sp^2$ -hybridized groups having at least two pairs of atoms being within 4.9 Å and the angle between the normal axes of the two  $sp^2$ -planes being less than 60°. Cation- $\pi$  interactions were considered as a cationic atom being within 7 Å of the center of an aromatic ring and less than 60° from the normal axis of the  $\pi$  face. Salt bridges are considered as a cationic atom and an anionic atom being within 6 Å of each other.

### 3. Supplementary Figures

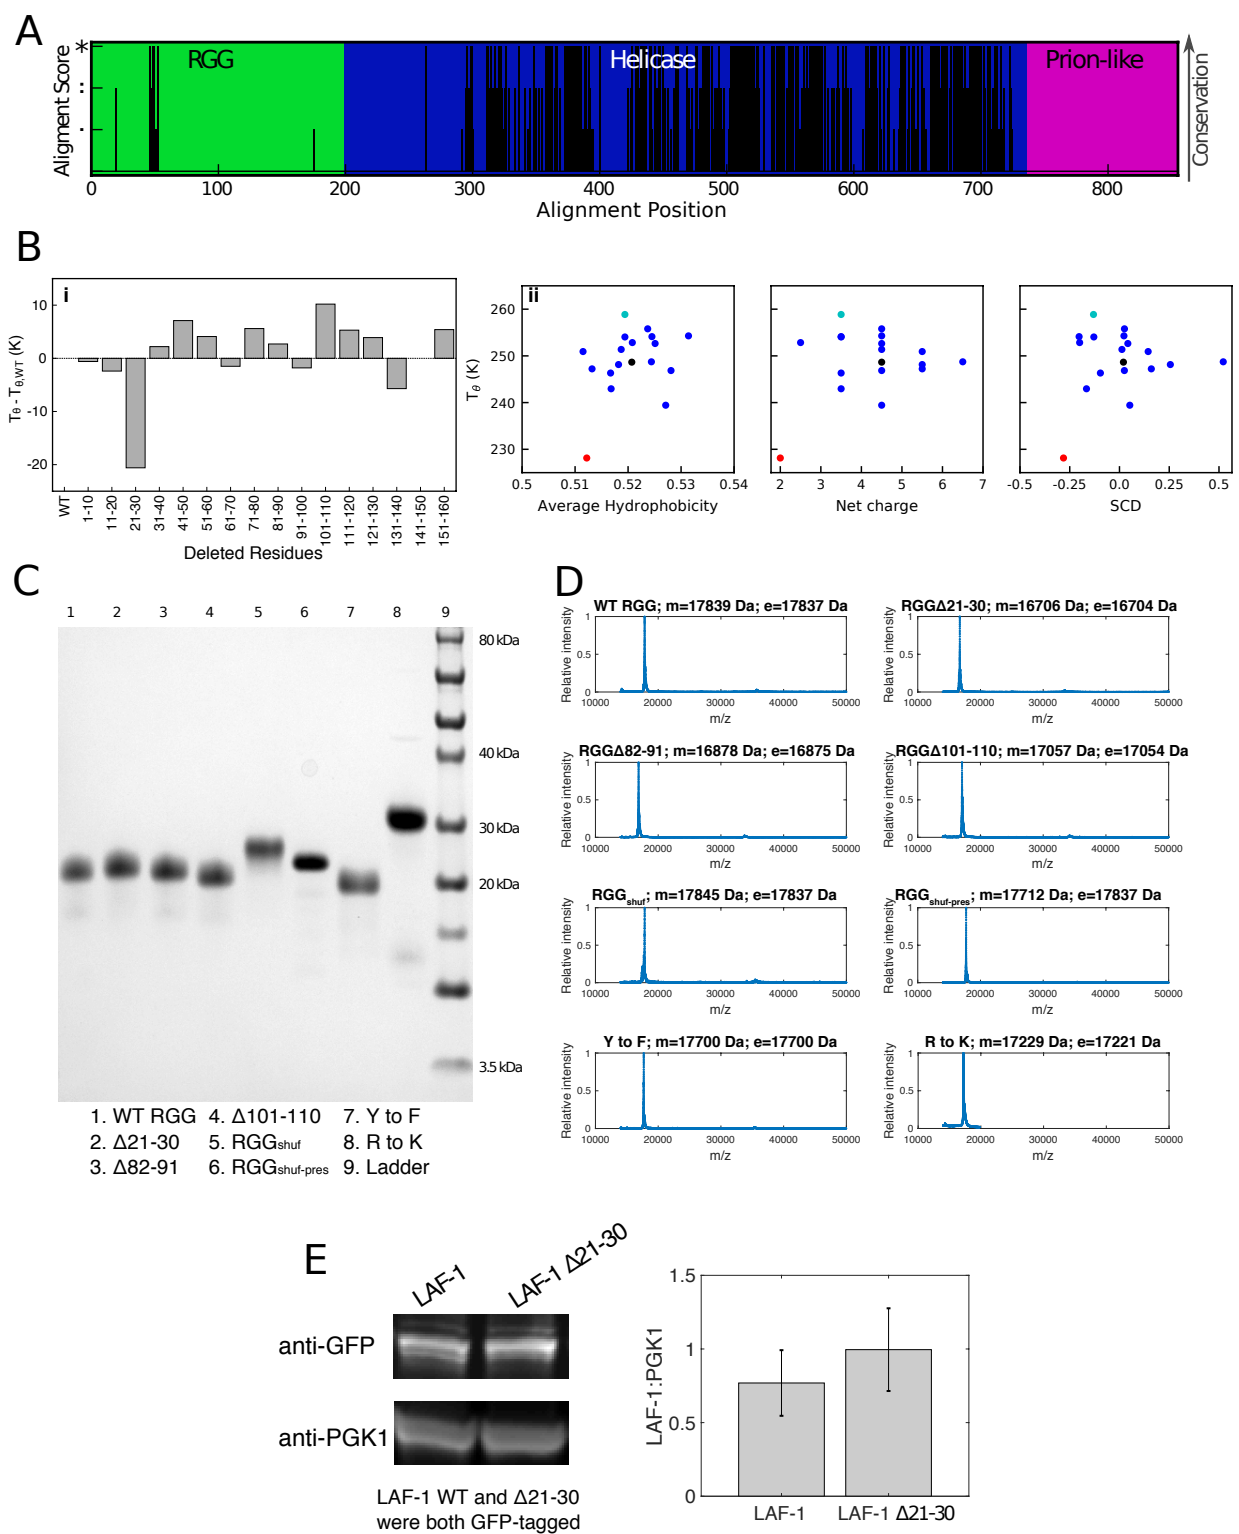

Figure S1: Characterization of deletion variants of LAF-1 RGG: A) Sequence conservation of full-

length LAF-1, showing a high degree of conservation in folded helicase domain, and poor conservation in disordered RGG and prion-like domains. B) i)  $T_{\theta}$  calculated from single-chain simulations of the deletion series subtracted from the  $T_{\theta}$  of WT LAF-1 RGG ii)  $T_{\theta}$  values compared to sequence descriptors (SI Text 1.4). In general, higher  $T_{\theta}$  is expected to be associated with higher average hydrophobicity, smaller absolute net charge, and more negative SCD. The symbol colors correspond to WT (black),  $\Delta 21-30$  (red),  $\Delta 101-110$  (cyan), with all other variants represented as blue. We note that many of the deletion sequences have a higher  $T_{\theta}$  than the full-length RGG, counter to the expectation that longer chain length generally favors LLPS. We believe this effect in the simulation model can be attributed to a subtle balance between the changes in hydrophobicity, net charge, and SCD rather than a single sequence descriptor. Given the simplicity of our simulation model and the errors associated with predicting phase separation based solely on  $T_{\theta}$ , it is possible our computational framework can distinguish sequences such as  $\Delta 21-30$  which have more significant changes to LLPS behavior, but cannot capture smaller changes as with the other sequences. C) SDS-PAGE gel of purified RGG and its variants. D) MALDI-TOF mass spectra of RGG domain and its variants, where m denotes measured and e denotes expected molecular mass. The only discrepancy  $> 10$  Da is RGG<sub>shuf-pres</sub> which is likely due to the loss of initiating methionine. E) Western blot shows a similar expression level of LAF-1 WT and LAF-1  $\Delta 21-30$  in yeast.

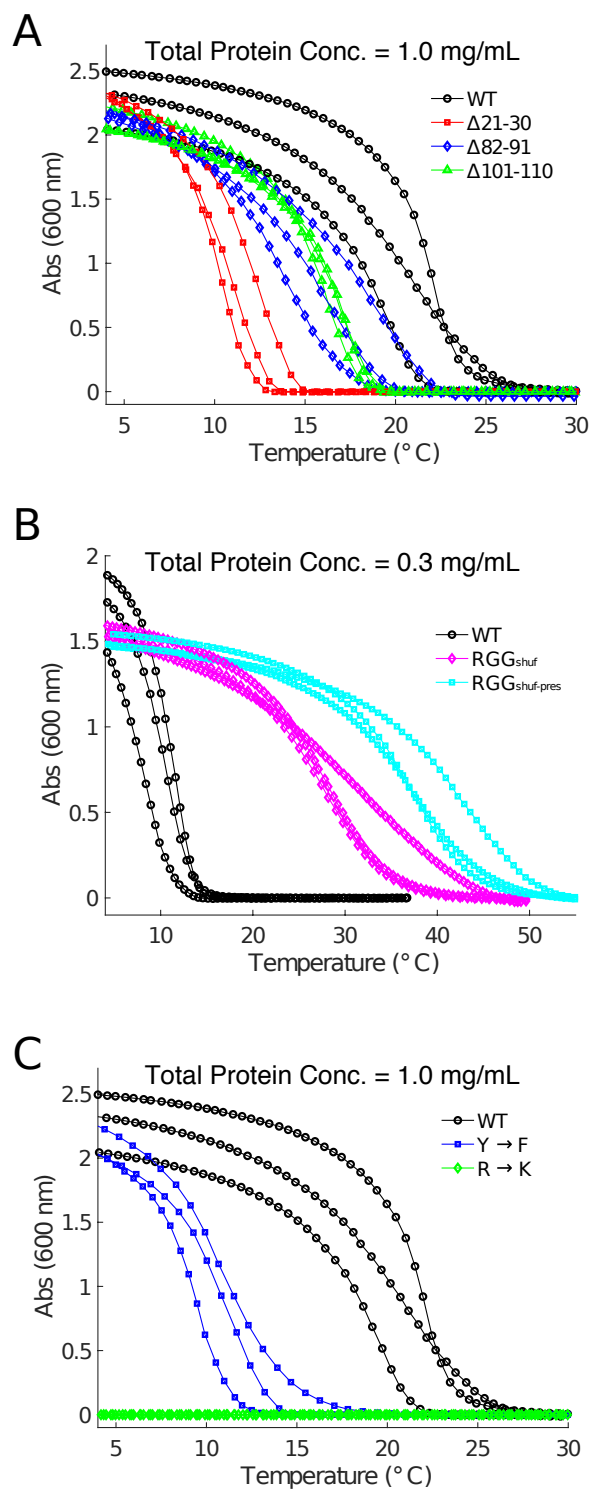

**Figure S2: Replicates of turbidity experiments** (corresponding to Fig. 1D, 2D, 3B): Turbidity curves of WT and A) deletion variants, B) shuffled sequences, and C) bulk mutations. Protein concentrations were 1 mg/mL for (A) and (C) and 0.3 mg/mL in (B). WT data is the same for (A) and (C). In all cases, proteins were in 150 mM NaCl, 20 mM Tris, pH 7.5.



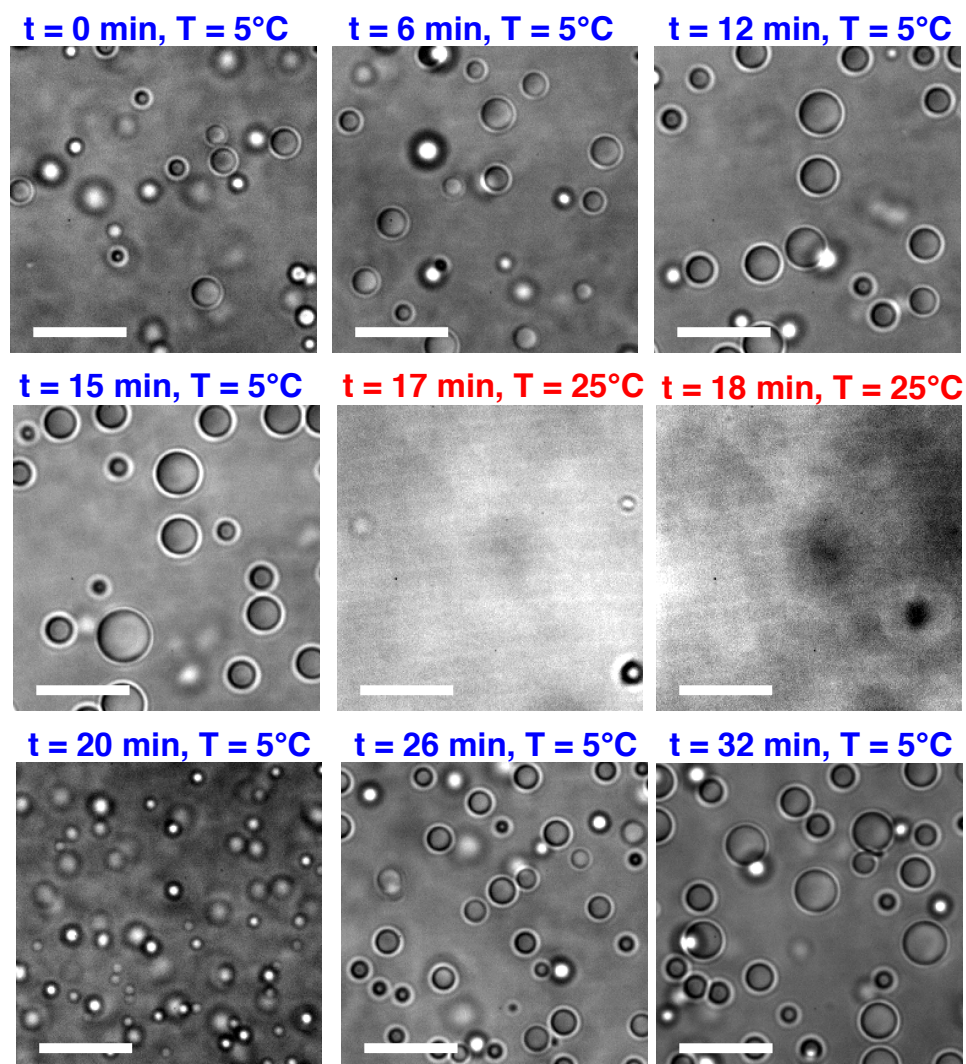

**Figure S3: Reversible LLPS of  $\Delta 21-30$  variant:** The  $\Delta 21-30$  variant of RGG undergoes reversible, temperature-dependent LLPS. Snapshots follow the formation of droplets over time starting at low temperature ( $5^\circ\text{C}$ ), then rapidly increasing temperature from  $5^\circ\text{C}$  to  $25^\circ\text{C}$  to disperse the droplets, and then rapidly decreasing the temperature back to  $5^\circ\text{C}$  to induce phase separation again. Scale bars: 10  $\mu\text{m}$ .

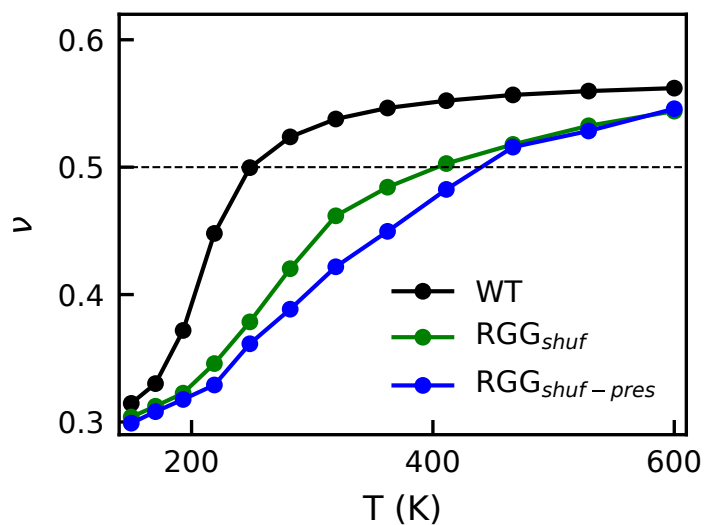

**Figure S4: Single-chain compactness of RGG and shuffled variants:** We calculate the Flory scaling exponent ( $\nu$ ) of the three variants of RGG as in previous work<sup>24,25</sup> and see that the WT is significantly more extended than the shuffled variants at a wide range of temperatures. We also see that RGG<sub>shuf-pres</sub> is marginally more compact than RGG<sub>shuf</sub>, consistent with our experimental results showing that RGG<sub>shuf-pres</sub> has the greatest LLPS propensity.

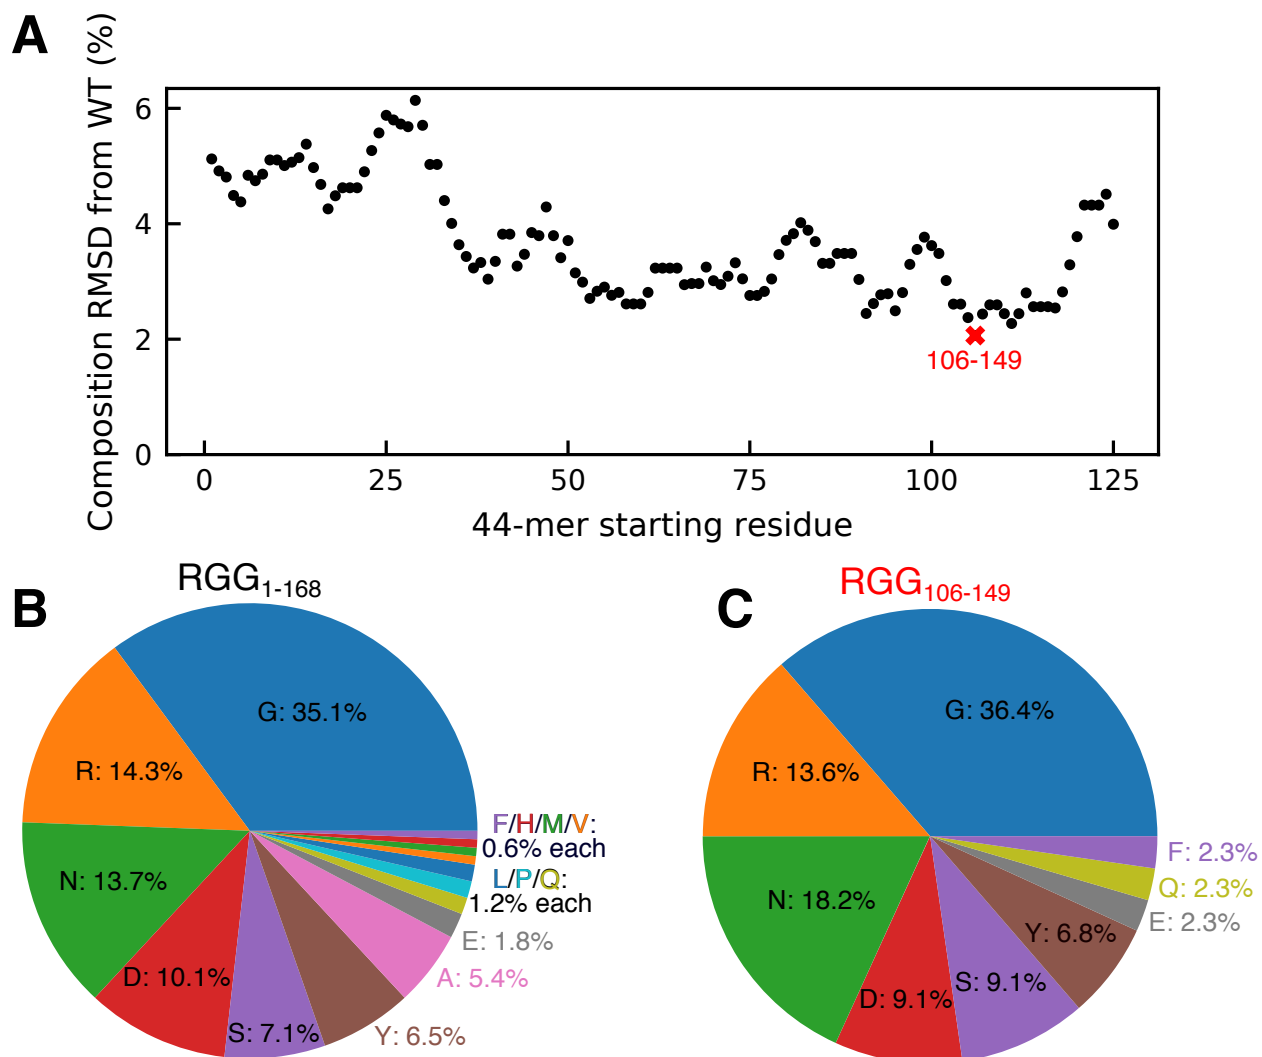

**Fig S5: Sequence composition of WT RGG and 44-residue fragments:** A) Composition-based RMSD is calculated for all continuous 44-residue fragments of LAF-1 RGG, showing the overall compositional similarity with the full 168-residue sequence. A total of  $168 - 44 + 1 = 125$  sequences of 44 residues were tested. B) Pie chart of amino acid composition of WT RGG is highly similar to C) pie chart of the lowest-RMSD 44-mer, RGG<sub>106-149</sub>.

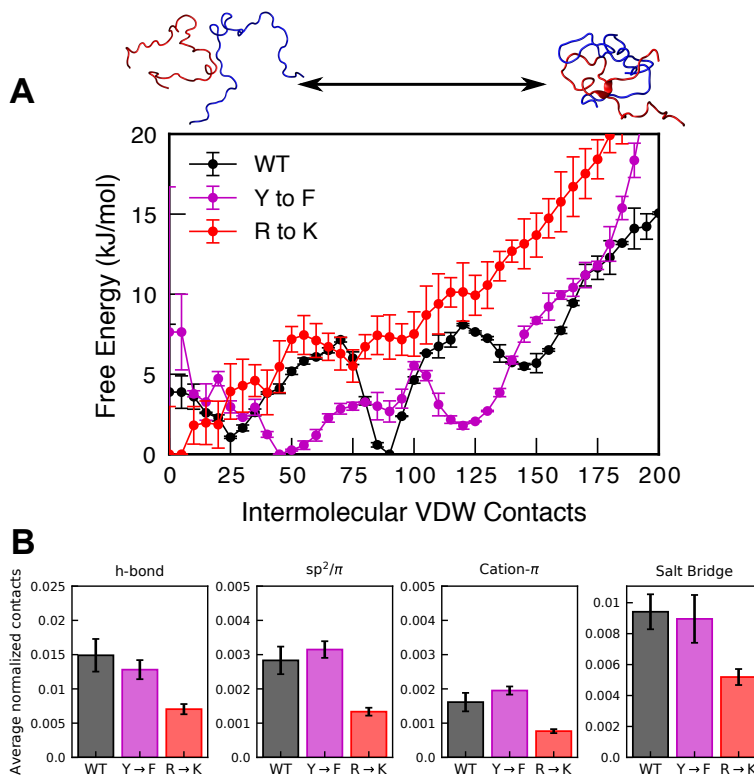

**Figure S6: All-atom simulations of RGG<sub>106-149</sub> show R→K has lower self-association:** A) Free energy profile of contact formation between two identical RGG<sub>106-149</sub> chains from simulations using well-tempered metadynamics. Both WT and Y→F show global minima at a finite number of contacts, while R→K has a global minimum at 0 contacts, indicating unfavorable self-interaction. B) Average total number of intermolecular contacts from two-chain simulations normalized by the average total number of VDW contacts for that system. Error bars for all plots are SEM with  $n = 2$ .

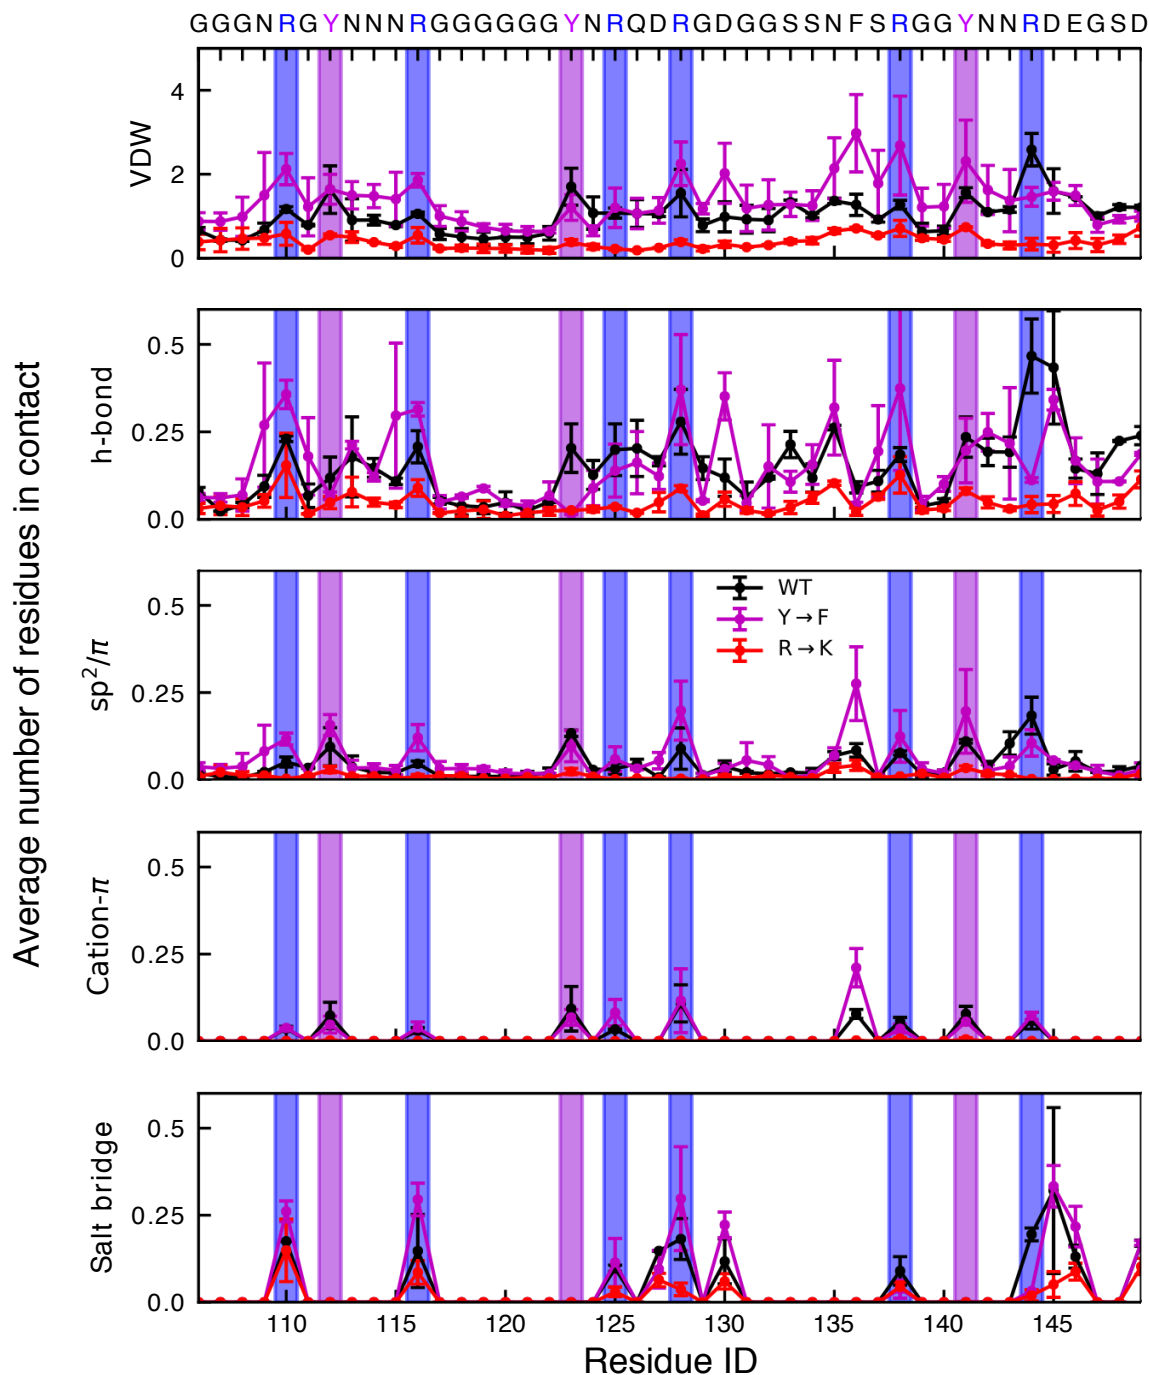

**Figure S7: Per-residue contacts from all-atom simulations:** Average number of intermolecular residue-residue pairs for each residue of the RGG<sub>106-149</sub> sequence. Two residues are considered to be in contact if there is at least one atom from each residue in contact (VDW) or at least one hydrogen bond,  $sp^2/\pi$  interaction, cation- $\pi$  interaction, or salt bridge between the two residues. In the case of VDW, multiple residues may be in contact with a single residue as only one atom needs to be in contact, and

residues may have VDW interactions with many other amino acids on the other protein chain. Generally, we see that VDW interactions and hydrogen bonds are well-distributed throughout the sequence for all variants of RGG<sub>106-149</sub>. Cation- $\pi$ ,  $sp^2/\pi$ , and salt-bridge interactions are less well-distributed due to their dependence on certain amino acid side chains. To highlight the contribution of aromatic and cationic residues, we have highlighted the arginine and tyrosine residues in these plots. Error bars are SEM with  $n = 2$ .

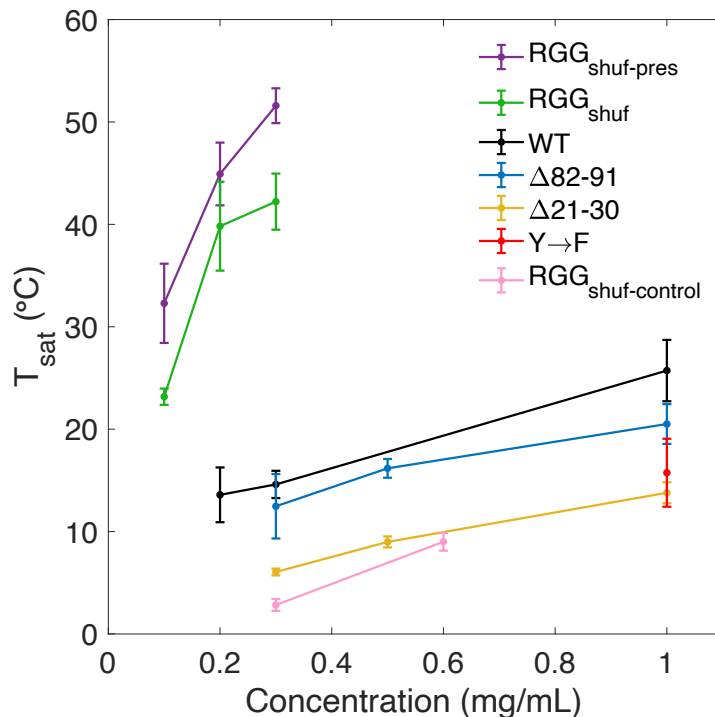

**Figure S8: Phase diagrams of RGG mutants:** Saturation temperature as a function of total protein concentration for RGG<sub>shuf</sub>, RGG<sub>shuf-pres</sub>, RGG<sub>shuf-control</sub>, Δ21-30, Δ82-91, Y→F, and WT RGG.  $T_{\text{sat}}$  values are determined from turbidity curves where absorbance first exceeds 0.02. Error bars are STD with  $n = 3$ .  $T_{\text{sat}}$  of WT is significantly different than that of Δ21-30, RGG<sub>shuf</sub>, RGG<sub>shuf-pres</sub>, and RGG<sub>shuf-control</sub> ( $p \leq 0.005$ ), but not significantly different than that of Δ82-91 ( $p = 0.73$ ), based on one-way ANOVA followed by Tukey's post-hoc test at 0.3 mg/mL.  $T_{\text{sat}}$  of WT is significantly different than that of Δ21-30 and Y→F ( $p \leq 0.005$ ), but not Δ82-91 ( $p = 0.12$ ), based on one-way ANOVA followed by Tukey's post-hoc test at 1 mg/mL.

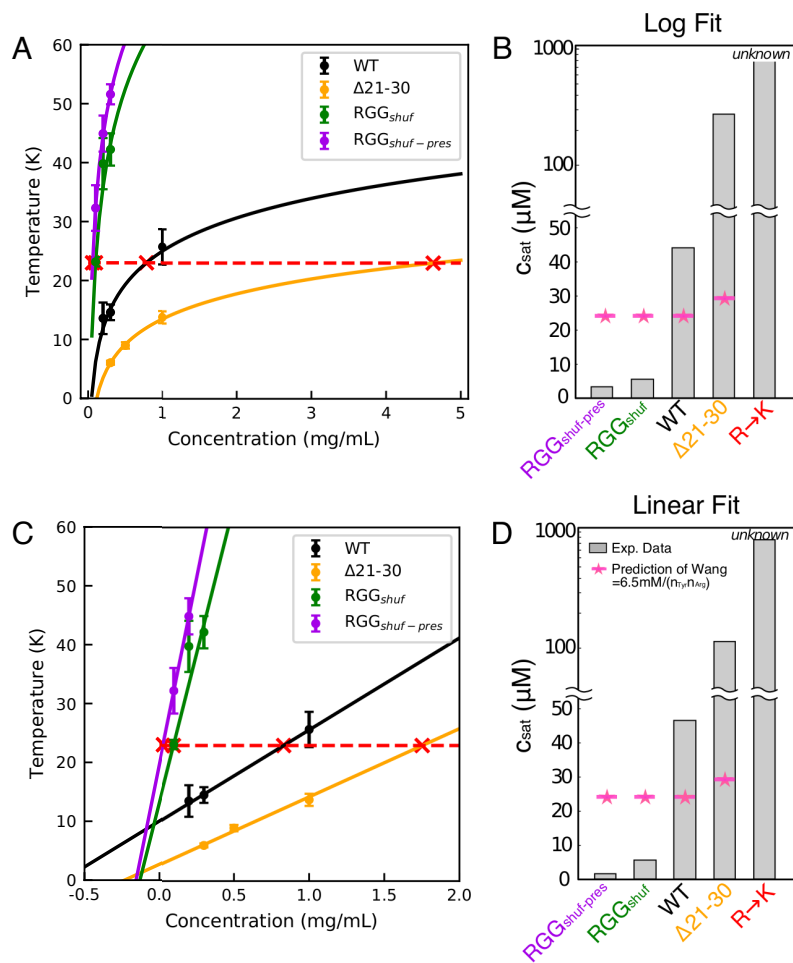

**Figure S9: Fitting of  $c_{sat}$  from experimental data:** A) Logarithmic fits to experimental data to calculate  $c_{sat}$  (red X's) at 23°C, (red dashed line). B) Bar plot of saturation concentrations for the different variants of RGG and comparison to empirical predictions using relationship from Wang et al.<sup>26</sup> C) Linear fits to experimental data to calculate  $c_{sat}$  as before. For  $RGG_{shuf-pres}$ , one data point was removed from the fitting such that the extrapolated  $c_{sat}$  value would be positive. D) Bar plot of saturation concentrations for the different variants of RGG using the linear fit and compared to empirical predictions using relationship from Wang et al. Error bars are STD with  $n = 3$ .



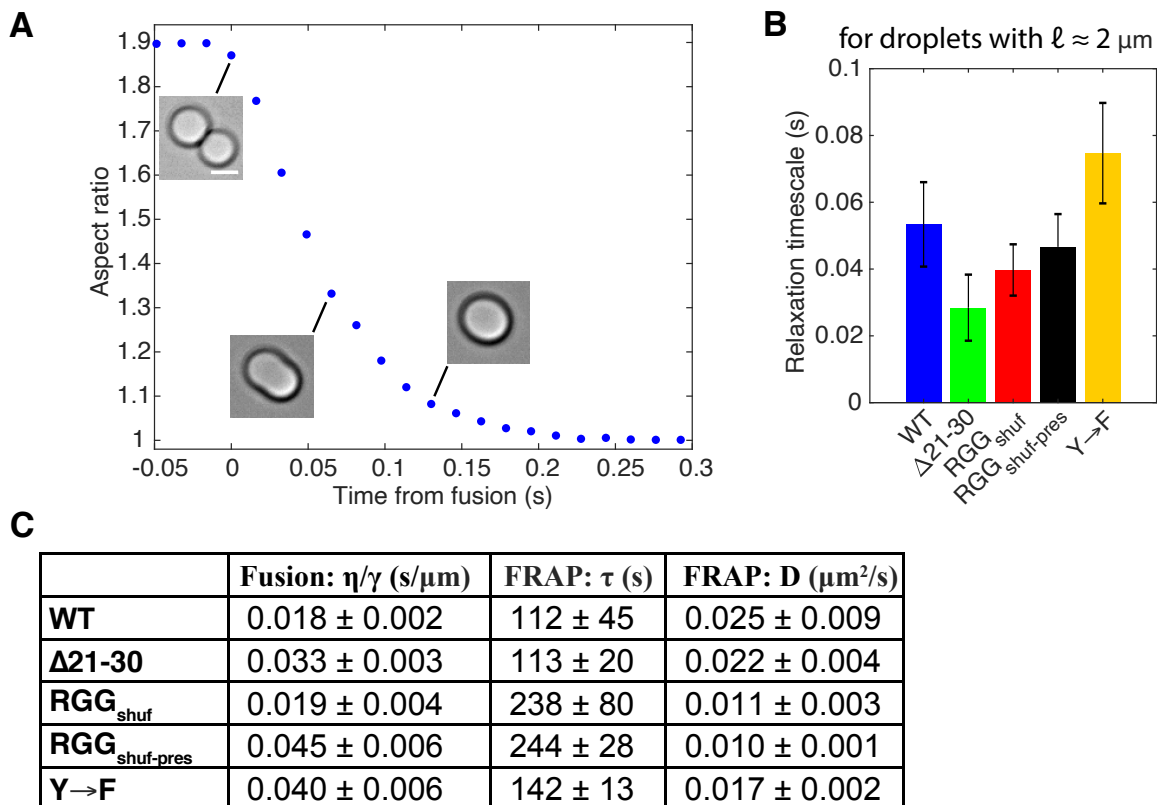

**Figure S10: Measurements of droplet material properties:** A) Example trace showing aspect ratio of fusing droplets relaxing exponentially to a sphere, from which the relaxation timescale is calculated. The data shown corresponds to the Y $\rightarrow$ F droplet fusion event in Fig. 5A, several images of which are reproduced here as insets beside their corresponding data points (scale bar: 2  $\mu\text{m}$ ). B) Timescale of droplet fusion for droplets of lengthscale  $\ell \approx 2 \mu\text{m}$  (range 1.75-2.25  $\mu\text{m}$ ). Error bars represent STD ( $n \geq 9$ ). C) Table summarizing measurements of inverse capillary velocity  $\eta/\gamma$  from droplet fusion experiments, as well as recovery timescale  $\tau$  and diffusivity D from FRAP.

## 4. Legends for Movies

**Movie S1.** Slab simulation of eIF4E binding domain, RYVPPHLR, in a simulation box of size 9.8 nm x 9.8 nm x 280 nm (total concentration 149.7 mg/ml) at 190 K.

**Movie S2.** Coexistence simulation of 100 chains of LAF-1 RGG<sub>shuf</sub>, in a simulation box of size 250 nm x 250 nm x 250 nm at 250 K. One chain is highlighted by sequence composition where red is anionic, blue is cationic, white is hydrophobic, and green is polar. The highlighted chain diffuses freely through the protein-rich assembly.

**Movie S3.** Coexistence simulation of 100 chains of LAF-1 RGG<sub>shuf-pres</sub>, in a simulation box of size 250 nm x 250 nm x 250 nm at 250 K. One chain is highlighted by sequence composition where red is anionic, blue is cationic, white is hydrophobic, and green is polar. The highlighted chain diffuses freely through the protein-rich assembly.

## SI References

1. Gietz, R. D. & Sugino, A. New yeast-Escherichia coli shuttle vectors constructed with in vitro mutagenized yeast genes lacking six-base pair restriction sites. *Gene* **74**, 527–534 (1988).
2. Studier, F. W. Stable Expression Clones and Auto-Induction for Protein Production in E. coli. in *Methods in molecular biology (Clifton, N.J.)* **1091**, 17–32 (2014).
3. Zhang, T. *et al.* An improved method for whole protein extraction from yeast *Saccharomyces cerevisiae*. *Yeast* **28**, 795–798 (2011).
4. Bi, E. & Pringle, J. R. *ZDS1 and ZDS2, Genes Whose Products May Regulate Cdc42p in Saccharomyces cerevisiae*. *Molecular and Cellular Biology* **16**, (1996).
5. Schuster, B. S. *et al.* Controllable Protein Phase Separation and Modular Recruitment to Form Responsive, Membraneless Organelles. *Nat. Commun.* **9**, 2985 (2018).
6. Taylor, N. O., Wei, M. T., Stone, H. A. & Brangwynne, C. P. Quantifying Dynamics in Phase-Separated Condensates Using Fluorescence Recovery after Photobleaching. *Biophys. J.* **117**, 1285–1300 (2019).
7. Wei, M.-T. *et al.* Phase behaviour of disordered proteins underlying low density and high permeability of liquid organelles. *Nat Chem* **9**, 1118–1125 (2017).
8. Brangwynne, C. P., Mitchison, T. J. & Hyman, A. A. Active liquid-like behavior of nucleoli determines their size and shape in *Xenopus laevis* oocytes. *Proc. Natl. Acad. Sci.* **108**, 4334–4339 (2011).
9. Zhang, H. *et al.* RNA Controls PolyQ Protein Phase Transitions. *Mol. Cell* **60**, 220–230 (2015).
10. Dignon, G. L., Zheng, W., Kim, Y. C., Best, R. B. & Mittal, J. Sequence determinants of protein phase behavior from a coarse-grained model. *PLoS Comput. Biol.* **14**, e1005941 (2018).
11. Anderson, J. A., Lorenz, C. D. & Travesset, A. General purpose molecular dynamics simulations fully implemented on graphics processing units. *J. Comput. Phys.* **227**, 5342–5359 (2008).
12. Ryan, V. H. *et al.* Mechanistic View of hnRNPA2 Low-Complexity Domain Structure, Interactions, and Phase Separation Altered by Mutation and Arginine Methylation. *Mol. Cell* **39**, 465–479 (2018).
13. Murthy, A. C. *et al.* Molecular interactions underlying liquid–liquid phase separation of the FUS low-complexity domain. *Nat. Struct. Mol. Biol.* **26**, 637–648 (2019).
14. Best, R. B., Zheng, W. & Mittal, J. Balanced protein-water interactions improve properties of disordered proteins and non-specific protein association. *J. Chem. Theory Comput.* **10**, 5113–5124 (2014).
15. Abascal, J. L. & Vega, C. A general purpose model for the condensed phases of water: TIP4P/2005. *J. Chem. Phys.* **123**, 234505 (2005).
16. Luo, Y. & Roux, B. Simulation of osmotic pressure in concentrated aqueous salt solutions. *J. Phys. Chem. Lett.* **1**, 183–189 (2010).
17. Sugita, Y. & Okamoto, Y. Replica exchange molecular dynamics method for protein folding. *Chem. Phys. Lett.* **314**, 141–151 (1999).
18. Barducci, A., Bussi, G. & Parrinello, M. Well-tempered metadynamics: A smoothly converging and tunable free-energy method. *Phys. Rev. Lett.* **100**, 1–4 (2008).
19. Bonomi, M. & Parrinello, M. Enhanced sampling in the well-tempered ensemble. *Phys. Rev. Lett.* **104**, 1–4 (2010).
20. Hess, B., Kutzner, C., Van Der Spoel, D. & Lindahl, E. GROMACS 4: Algorithms for highly efficient, load-balanced, and scalable molecular simulation. *J. Chem. Theory Comput.* **4**, 435–447 (2008).

21. Tribello, G. A., Bonomi, M., Branduardi, D., Camilloni, C. & Bussi, G. PLUMED 2: New feathers for an old bird. *Comput. Phys. Commun.* **185**, 604–613 (2014).
22. Tiwary, P. & Parrinello, M. A time-independent free energy estimator for metadynamics. *J. Phys. Chem. B* **119**, 736–742 (2015).
23. Vernon, R. M. *et al.* Pi-Pi contacts are an overlooked protein feature relevant to phase separation. *Elife* **7**, 1–48 (2018).
24. Dignon, G. L., Zheng, W., Best, R. B., Kim, Y. C. & Mittal, J. Relation between single-molecule properties and phase behavior of intrinsically disordered proteins. *Proc. Natl. Acad. Sci.* **115**, 9929–9934 (2018).
25. Dignon, G. L., Zheng, W., Kim, Y. C. & Mittal, J. Temperature-Controlled Liquid-Liquid Phase Separation of Disordered Proteins. *ACS Cent. Sci.* **5**, 821–830 (2019).
26. Wang, J. *et al.* A Molecular Grammar Governing the Driving Forces for Phase Separation of Prion-like RNA Binding Proteins. *Cell* **174**, 688–699 (2018).
